# Supplementary material
Source: PubMed Central journal article supplement (PMC3264253)
Supplement: supp_56.2.875_SupplementalMaterial1.pdf [file supp_56.2.875_SupplementalMaterial1.pdf]

# **Simultaneous Delivery of Tenofovir and Acyclovir *via* an Intravaginal Ring**

John A. Moss,<sup>1</sup> Amanda M. Malone,<sup>2</sup> Thomas J. Smith,<sup>1,2,3</sup> Sean Kennedy,<sup>1</sup> Etana Kopin,<sup>2</sup> Cali Nguyen,<sup>1,2</sup> Josh Gilman,<sup>2</sup> Irina Butkyavichene,<sup>2</sup> Kathleen L. Vincent,<sup>4</sup> Massoud Motamedi,<sup>4</sup> David R. Friend,<sup>5</sup> Meredith R. Clark,<sup>5</sup> and Marc M. Baum<sup>\*1</sup>

<sup>1</sup>*Department of Chemistry, Oak Crest Institute of Science, 2275 E. Foothill Blvd., Pasadena, California*

<sup>2</sup>*Auritec Pharmaceuticals, Inc., 1434 6th. St. Suite 3, Santa Monica, California*

<sup>3</sup>*Department of Ophthalmology, University of Kentucky, Lexington, Kentucky*

<sup>4</sup>*Center for Biomedical Engineering, 301 University Boulevard, University of Texas Medical Branch at Galveston, Texas*

<sup>5</sup>*CONRAD, 1911 Fort Myer Drive, Suite 900, Arlington, Virginia*

\*Corresponding author. Mailing address: Department of Chemistry, Oak Crest Institute of Science, 2275 E. Foothill Blvd., Pasadena, California. Phone: 01 (1) 817 0883. Fax: 01 (1) 817 0884. E-mail: m.baum@oak-crest.org.

## SUPPLEMENTAL MATERIAL

**Bioanalysis methods used in the rabbit study.** 9-[(2-Hydroxyethoxy-*d4*)methyl]guanine (ACV-*d4*, Toronto Research Chemicals, Inc.), {[*(2R)*-1-(6-amino-9*H*-purin-9-yl)propan-2-yl]oxy}methyl)-*d6*-phosphonic acid (TFV-*d6*, Toronto Research Chemicals, Inc.), tenofovir diphosphate (TFV DP), and tenofovir diphosphate, [adenine-<sup>13</sup>C(U)]- (IS for TFV DP, Moravek Biochemicals) were used as internal standards and reference compounds. “Total TFV” refers to phosphatase-treated samples as described below.

Weck-Cel sponges were extracted with internal standard solution (50  $\mu$ L; for TFV, 200 ng mL<sup>-1</sup> TFV-*d6*; for ACV, 50 ng mL<sup>-1</sup> ACV-*d4*) and methanol-water (10:90, 1000  $\mu$ L), followed by vortex agitation and centrifugation for 5 min at 4500 rpm and 5°C. A 150  $\mu$ L aliquot of the supernatant was transferred to a 96-well plate for analysis of TFV. A 25  $\mu$ L aliquot of the supernatant was transferred to a 96-well plate and diluted with 500  $\mu$ L of acetonitrile for analysis of ACV. Sample analysis was performed by LC/MS using an Agilent Series 1200 HPLC system coupled to an Applied Biosystems/MDS SCIEX API 5000 MS/MS detector. For TFV analysis: Synergi Polar-RP column (2.0  $\times$  75 mm, 4  $\mu$ m, Phenomenex) and a SecurityGuard Polar-RP (2  $\times$  4 mm, Phenomenex) guard column; injection volume 10  $\mu$ L; mobile phase 3% acetonitrile in 0.1% formic acid in water run isocratically at a flow rate 0.3 mL min<sup>-1</sup>; run time 4 min; single ion mode detection, *m/z* 288 $\rightarrow$ 176 (TFV), 294 $\rightarrow$ 182 (IS, TFV-*d6*). For ACV analysis: Atlantis HILIC Silica column (2.1  $\times$  50 mm, 3  $\mu$ m, Waters); injection volume 10  $\mu$ L; gradient program, 1 min hold 10:90 A:B (A, 5 mM ammonium acetate; B, acetonitrile), 0.2 min ramp to 50:50 A:B; 1.1 min hold at 50:50 A:B; 0.2 min ramp to 2:98 A:B; 1.5 min hold at 2:98 A:B; 0.2 min ramp to 10:90 A:B; 0.8 min hold at 10:90 A:B at a flow rate 0.8 mL min<sup>-1</sup>; run time 6 min; single ion mode detection, *m/z* 226 $\rightarrow$ 152 (ACV), 230 $\rightarrow$ 152 (IS, ACV-*d4*).

Plasma samples (100  $\mu\text{L}$ ) were transferred to a 96-well plate and treated with internal standard solution (50  $\mu\text{L}$ ; for TFV, 50  $\text{ng mL}^{-1}$  TFV-*d6*; for ACV, 50  $\text{ng mL}^{-1}$  ACV-*d4*) and 0.5% formic acid (500  $\mu\text{L}$ ), followed by purification by solid phase extraction, evaporation of the eluents under a stream of nitrogen at 50°C, and reconstitution of the residue with 200  $\mu\text{L}$  of water. Sample analysis was performed by LC/MS using an Agilent Series 1100 HPLC system coupled to an Applied Biosystems/MDS SCIEX API 5000 MS/MS detector. For TFV analysis: Synergi Polar-RP column (2.0  $\times$  75 mm, 4  $\mu\text{m}$ , Phenomenex) and a SecurityGuard Polar-RP (2  $\times$  4 mm, Phenomenex) guard column; injection volume 10  $\mu\text{L}$ ; mobile phase 2% acetonitrile in 0.1% acetic acid in water run isocratically at a flow rate 0.3  $\text{mL min}^{-1}$ ; run time 4 min; single ion mode detection,  $m/z$  288 $\rightarrow$ 176 (TFV), 294 $\rightarrow$ 182 (IS, TFV-*d6*). For ACV analysis: Atlantis dC18 column (2.1  $\times$  150 mm, 3  $\mu\text{m}$ , Waters); injection volume 10  $\mu\text{L}$ ; mobile phase 97:3 mM ammonium formate in water with 0.1% formic acid:acetonitrile run isocratically at a flow rate 0.3  $\text{mL min}^{-1}$ ; run time 6 min; single ion mode detection,  $m/z$  226 $\rightarrow$ 152 (ACV), 230 $\rightarrow$ 152 (IS, ACV-*d4*).

Tissue samples were homogenized mechanically with dry ice to produce a finely ground material. Following sublimation of the dry ice at -20°C, the ground tissue was diluted tenfold (100 mg tissue in 1 mL of solvent) with acetonitrile:water (1:1, v/v) and sonicated for 5 min in an ice-water bath. The resulting mixture was centrifuged at 4500 rpm for 10 min and a 50  $\mu\text{L}$  aliquot (100  $\mu\text{L}$  in the case of total TFV) of the supernatant was transferred to a 96-well plate. Internal standard solution (50  $\mu\text{L}$ ; for total TFV, 25  $\text{ng mL}^{-1}$  TFV-*d6*; for TFV, 50  $\text{ng mL}^{-1}$  TFV-*d6* and 100  $\text{ng mL}^{-1}$  TFV-DP, adenine- $^{13}\text{C}_5$ ; for ACV, 100  $\text{ng mL}^{-1}$  ACV-*d4*) and acetonitrile (250  $\mu\text{L}$ ) were added to each well, followed by vortex agitation and centrifugation for 5 min at 4000 rpm and 5°C. A 150  $\mu\text{L}$  aliquot of the supernatant was transferred to a 96-well plate and the

solvent was evaporated under a stream of nitrogen at 50°C. The dried residue was reconstituted with 150 µL of water followed by vortex agitation and centrifugation for 5 min at 4500 rpm and 5°C. For total TFV, the sample and internal standard were treated with acid phosphatase (25 units mL<sup>-1</sup> in 50 mM ammonium acetate, pH 4.0) at 40°C for 40 min, followed by filtration and processing as described above. Rabbit lymph node homogenate was prepared by freezing the samples at -78°C directly followed by pulverization. For each 20 mg of crushed lymph node, methanol:water (60:40 v/v, 1 mL) was added and the samples were sonicated, centrifuged at 4000 rpm, 5°C, for 10 min and a 200 µL aliquot of the supernatant was transferred to a 96-well plate. Internal standard solution (20 µL; 500 ng mL<sup>-1</sup> TFV-*d6*) was added to each well, followed by vortex agitation. The samples then were membrane filtered at 14000 rpm for 20 min through Microcon sample reservoir (50K membrane) vial inserts. A 65 µL aliquot of the mixed, filtered solution was transferred to a 96-well plate and another 65 µL of 1% formic acid in water was added followed by mixing and centrifugation for 5 min at 4000 rpm and 4°C.

Sample analysis was performed by LC/MS using an Agilent Series 1100 HPLC system coupled to an Applied Biosystems/MDS SCIEX API 5000 MS/MS detector. For total TFV analysis, the method described above for plasma samples was used. For TFV and TFV-DP analysis: BioBasic AX column (3.0 × 50 mm, 5 µm, Thermo Scientific); injection volume 5 µL; gradient program, 0.5 min hold 10:90 A:B (A, acetonitrile:10 mM ammonium acetate in water, 30:70 v/v, pH 6; B, acetonitrile:1 mM ammonium acetate in water, 30:70 v/v, pH 10.5) at a flow rate of 0.4 mL min<sup>-1</sup>, 0.5 min ramp to 50:50 A:B; 1.0 min hold at 50:50 A:B; 0.1 min ramp to 100% B; 5.9 min hold at 100% B; 0.1 min ramp to 95:5 A:B at 1.0 mL min<sup>-1</sup>; 3.9 min hold at 95:5 A:B; run time 12 min; single ion mode detection, *m/z* 288→176 (TFV), 294→182 (IS, TFV-*d6*), 446→159 (TFV-DP), 451→159 (IS for TFV-DP). For TFV in lymph tissue: Zorbax

XDB-C8 column (4.6 × 75 mm, 3.5 μm, Agilent); injection volume 10 μL; gradient program, 0.5 min hold 80:20 A:B (A, 0.2% formic acid, 5 mM ammonium acetate in water; B, 0.2% formic acid in methanol) at a flow rate of 0.7 mL min<sup>-1</sup>, 0.5 min ramp to 5:95 A:B; 1.0 min hold at 5:95 A:B; 0.1 min ramp to 80:20 A:B; 3.1 min hold at 80:20 A:B; run time 5.2 min; single ion mode detection, *m/z* 288→176 (TFV), 294→182 (IS, TFV-*d6*). For ACV, the analytical method described above for the plasma samples was employed.
